# Supplementary material
Source: Springer Nature journal article supplement (https://www.springermedizin.de/resource/supplementary/40164_2013_65_MOESM14_ESM.pdf/9687108)

Expression of ABC gene relative to GAPDH

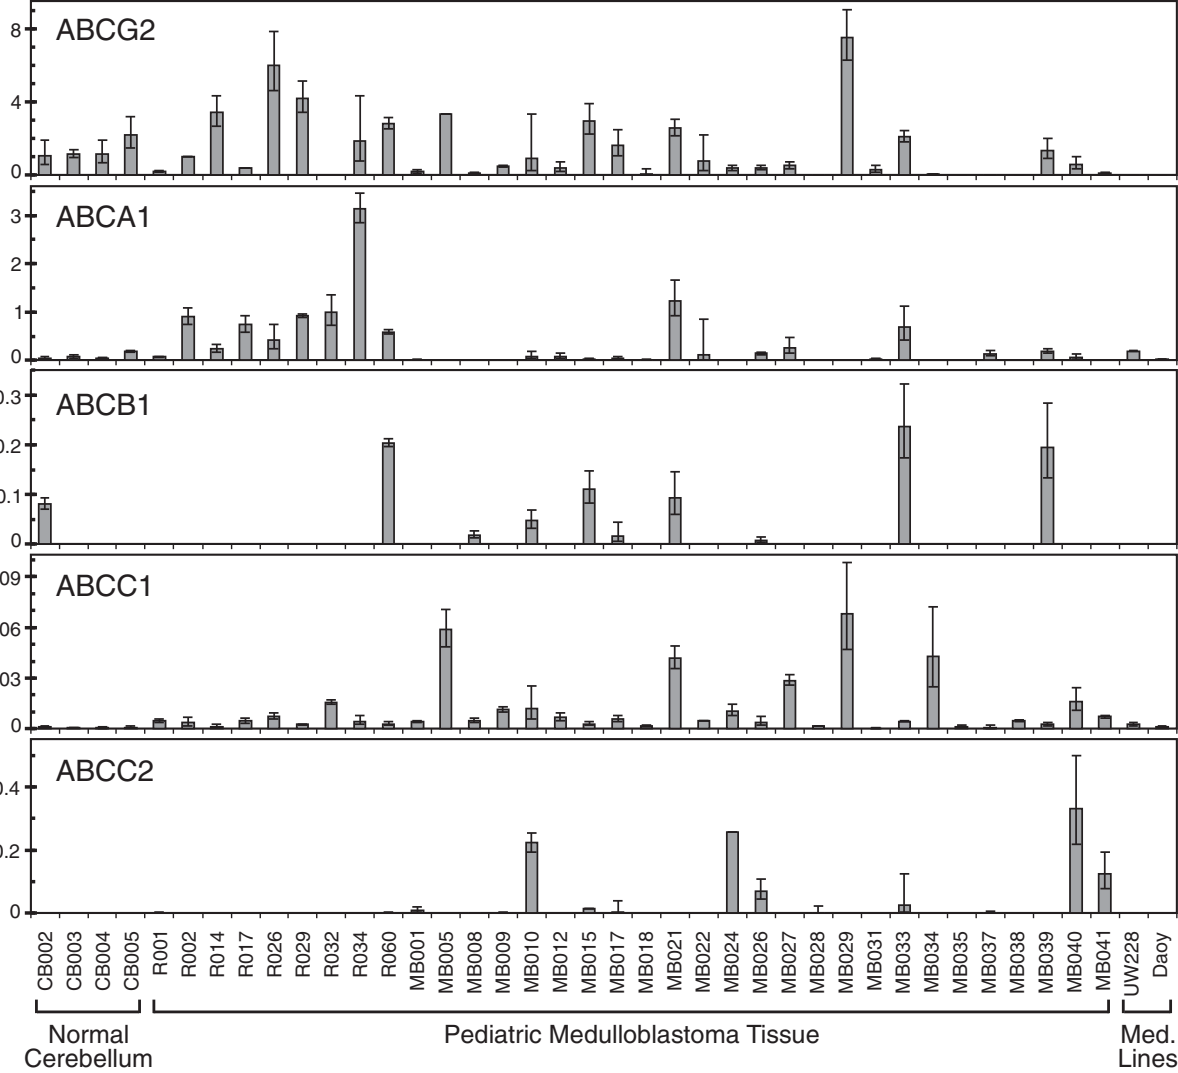

Supplement: MOESM14 [file 9687108]
